# Supplementary material
Source: publisher figshare collection journal article supplement (https://acs.figshare.com/ndownloader/files/4037665)
Supplement: Supplementary file 1 [file 4037665]

 
data_1 
 
_audit_creation_method            SHELXL-97 
_chemical_name_systematic 
; 
 ? 
; 
_chemical_name_common             [Co3(TBTC)2(DMF)2] 
_chemical_melting_point           ? 
_chemical_formula_moiety          'C72 H54 Co3 N2 O20' 
_chemical_formula_sum 
 'C72 H54 Co3 N2 O20' 
_chemical_formula_weight          1443.96 
 
loop_ 
 _atom_type_symbol 
 _atom_type_description 
 _atom_type_scat_dispersion_real 
 _atom_type_scat_dispersion_imag 
 _atom_type_scat_source 
 'C'  'C'   0.0033   0.0016 
 'International Tables Vol C Tables 4.2.6.8 and 6.1.1.4' 
 'H'  'H'   0.0000   0.0000 
 'International Tables Vol C Tables 4.2.6.8 and 6.1.1.4' 
 'Co'  'Co'   0.3494   0.9721 
 'International Tables Vol C Tables 4.2.6.8 and 6.1.1.4' 
 'N'  'N'   0.0061   0.0033 
 'International Tables Vol C Tables 4.2.6.8 and 6.1.1.4' 
 'O'  'O'   0.0106   0.0060 
 'International Tables Vol C Tables 4.2.6.8 and 6.1.1.4' 
 
_symmetry_cell_setting            triclinic
_symmetry_space_group_name_H-M     P-1
_symmetry_space_group_name_Hall    '-P 1'
 
loop_ 
 _symmetry_equiv_pos_as_xyz 
 'x, y, z' 
 '-x, -y, -z' 
 
_cell_length_a                    9.749(17) 
_cell_length_b                    12.66(2) 
_cell_length_c                    17.06(3) 
_cell_angle_alpha                 87.01(5) 
_cell_angle_beta                  88.51(5) 
_cell_angle_gamma                 77.84(7) 
_cell_volume                      2055(6) 
_cell_formula_units_Z             1 
_cell_measurement_temperature           293.1500
_cell_measurement_reflns_used           4144
_cell_measurement_theta_min             3.1756
_cell_measurement_theta_max             27.4410
 
_exptl_crystal_description              'Prism'
_exptl_crystal_colour                   'Yellow'
_exptl_crystal_size_max                 0.2000
_exptl_crystal_size_mid                 0.2000
_exptl_crystal_size_min                 0.2000 
_exptl_crystal_density_meas       ? 
_exptl_crystal_density_diffrn     1.167 
_exptl_crystal_density_method     'not measured' 
_exptl_crystal_F_000              741 
_exptl_absorpt_coefficient_mu     0.661 
_exptl_absorpt_correction_type          'Multi-scan'
_exptl_absorpt_correction_T_max         1.0000
_exptl_absorpt_correction_T_min         0.4295 
_exptl_absorpt_process_details    crystalclear 
 
_exptl_special_details 
; 

 
The structure contains disordered solvents.
Because it was difficult to refine a xonsisten disordered model, 
their contribution was subtracted from the observed structure factors
according to the BYPASS procedure, as implemented in PLATON.
van der Sluis, P., Spek, A. L. (1990). Acta Cryst. A46, 194-201. 
Spek, A. L. (2003). J. Appl. Cryst. 36, 7-13.

(see more at the bottom of this .cif file)
 
; 
 
_diffrn_ambient_temperature       293.1500
_diffrn_radiation_wavelength      0.71073 
_diffrn_radiation_type            MoK\a 
_diffrn_radiation_source          'fine-focus sealed tube' 
_diffrn_radiation_monochromator   graphite 
_diffrn_measurement_device_type   
;
Saturn70 (4x4 bin mode)
;
_diffrn_detector_area_resol_mean        28.5714
_diffrn_measurement_method              'CCD_Profile_fitting'
_diffrn_standards_interval_count  ? 
_diffrn_standards_interval_time   ? 
_diffrn_standards_decay_%         none 
_diffrn_reflns_number             14145 
_diffrn_reflns_av_R_equivalents   0.0561 
_diffrn_reflns_av_sigmaI/netI     0.1041 
_diffrn_reflns_limit_h_min        -12 
_diffrn_reflns_limit_h_max        9 
_diffrn_reflns_limit_k_min        -16 
_diffrn_reflns_limit_k_max        16 
_diffrn_reflns_limit_l_min        -22 
_diffrn_reflns_limit_l_max        22 
_diffrn_reflns_theta_min          2.08 
_diffrn_reflns_theta_max          27.48 
_reflns_number_total              8572 
_reflns_number_gt                 3867 
_reflns_threshold_expression      >2sigma(I) 
 
_computing_data_collection              'CrystalClear (Rigaku/MSC Inc., 2005)'
_computing_cell_refinement              'CrystalClear (Rigaku/MSC Inc., 2005)'
_computing_data_reduction               'CrystalClear (Rigaku/MSC Inc., 2005)'
_computing_structure_solution     'SHELXS-97 (Sheldrick, 1990)' 
_computing_structure_refinement   'SHELXL-97 (Sheldrick, 1997)' 
_computing_molecular_graphics     'RIGAKU SHELXTL' 
_computing_publication_material   'RIGAKU SHELXTL' 
 
_refine_special_details 
; 
 Refinement of F^2^ against ALL reflections.  The weighted R-factor wR and 
 goodness of fit S are based on F^2^, conventional R-factors R are based 
 on F, with F set to zero for negative F^2^. The threshold expression of 
 F^2^ > 2sigma(F^2^) is used only for calculating R-factors(gt) etc. and is 
 not relevant to the choice of reflections for refinement.  R-factors based 
 on F^2^ are statistically about twice as large as those based on F, and R- 
 factors based on ALL data will be even larger. 
; 
 
_refine_ls_structure_factor_coef  Fsqd  
_refine_ls_matrix_type            full 
_refine_ls_weighting_scheme       calc  
_refine_ls_weighting_details 
 'calc w=1/[\s^2^(Fo^2^)+(0.1523P)^2^+0.0000P] where P=(Fo^2^+2Fc^2^)/3' 
_atom_sites_solution_primary      direct 
_atom_sites_solution_secondary    difmap 
_atom_sites_solution_hydrogens    geom 
_refine_ls_hydrogen_treatment     constr 
_refine_ls_extinction_method      none 
_refine_ls_extinction_coef        ? 
_refine_ls_number_reflns          8572 
_refine_ls_number_parameters      442 
_refine_ls_number_restraints      0 
_refine_ls_R_factor_all           0.1281 
_refine_ls_R_factor_gt            0.0862 
_refine_ls_wR_factor_ref          0.2565 
_refine_ls_wR_factor_gt           0.2240 
_refine_ls_goodness_of_fit_ref    0.855 
_refine_ls_restrained_S_all       0.855 
_refine_ls_shift/su_max           0.000 
_refine_ls_shift/su_mean          0.000 
 
loop_ 
 _atom_site_label 
 _atom_site_type_symbol 
 _atom_site_fract_x 
 _atom_site_fract_y 
 _atom_site_fract_z 
 _atom_site_U_iso_or_equiv 
 _atom_site_adp_type 
 _atom_site_occupancy 
 _atom_site_symmetry_multiplicity 
 _atom_site_calc_flag 
 _atom_site_refinement_flags 
 _atom_site_disorder_assembly 
 _atom_site_disorder_group 
Co1 Co 0.5000 0.5000 -0.5000 0.0506(3) Uani 1 2 d S . . 
N1 N -0.1948(5) 0.9050(4) -0.5039(3) 0.0785(13) Uani 1 1 d . . . 
Co2 Co 0.19503(7) 0.70586(6) -0.54358(4) 0.0606(3) Uani 1 1 d . . . 
O3 O 0.2082(4) 0.6948(3) -0.4303(2) 0.0740(11) Uani 1 1 d . . . 
O4 O 0.3865(4) 0.5548(3) -0.3957(2) 0.0669(9) Uani 1 1 d . . . 
C6 C -0.0805(7) 0.8287(5) -0.5018(4) 0.0833(17) Uani 1 1 d . . . 
O7 O -0.4854(4) 0.6578(3) 0.4684(2) 0.0704(10) Uani 1 1 d . . . 
O8 O 0.3151(3) 1.5288(3) 0.4316(2) 0.0716(10) Uani 1 1 d . . . 
C8 C -0.2111(8) 1.0041(6) -0.5566(5) 0.110(3) Uani 1 1 d . . . 
C10 C -0.3246(9) 0.8937(8) -0.4547(6) 0.142(4) Uani 1 1 d . . . 
O11 O 0.0261(4) 0.8347(3) -0.5443(2) 0.0770(11) Uani 1 1 d . . . 
O12 O -0.1275(4) 0.8682(3) 0.2082(2) 0.0781(11) Uani 1 1 d . . . 
O15 O 0.2883(4) 0.8135(3) -0.0796(2) 0.0887(13) Uani 1 1 d . . . 
O17 O -0.6572(4) 0.7707(3) 0.4016(2) 0.0805(11) Uani 1 1 d . . . 
O18 O 0.1801(5) 1.2004(3) 0.1836(3) 0.0906(13) Uani 1 1 d . . . 
C20 C 0.3587(7) 0.6693(5) -0.1645(3) 0.089(2) Uani 1 1 d . . . 
H20 H 0.4072 0.6277 -0.1219 0.106 Uiso 1 1 calc R . . 
C22 C 0.1573(5) 0.9587(4) 0.1869(3) 0.0622(13) Uani 1 1 d . . . 
C24 C 0.2913(5) 0.6839(4) -0.3012(3) 0.0607(12) Uani 1 1 d . . . 
C25 C -0.5281(6) 0.7271(4) 0.4137(3) 0.0653(13) Uani 1 1 d . . . 
O27 O 0.1060(4) 1.6097(3) 0.3941(3) 0.0929(14) Uani 1 1 d . . . 
C28 C 0.1845(6) 0.9269(4) 0.0251(3) 0.0638(13) Uani 1 1 d . . . 
C29 C 0.2983(5) 0.6397(5) -0.3817(3) 0.0624(13) Uani 1 1 d . . . 
C30 C 0.1006(5) 0.8764(4) 0.1547(3) 0.0621(13) Uani 1 1 d . . . 
C37 C 0.0760(7) 1.4322(5) 0.3024(5) 0.095(2) Uani 1 1 d . . . 
H37 H -0.0071 1.4850 0.3112 0.114 Uiso 1 1 calc R . . 
C38 C 0.1330(7) 0.9801(6) 0.2754(4) 0.0854(18) Uani 1 1 d . . . 
H38A H 0.1905 0.9207 0.3067 0.128 Uiso 1 1 calc R . . 
H38B H 0.0337 0.9848 0.2890 0.128 Uiso 1 1 calc R . . 
H38C H 0.1595 1.0483 0.2864 0.128 Uiso 1 1 calc R . . 
C40 C 0.2306(5) 1.0207(4) 0.1392(3) 0.0641(13) Uani 1 1 d . . . 
C42 C -0.2818(6) 0.7115(4) 0.3623(3) 0.0687(14) Uani 1 1 d . . . 
H42 H -0.2553 0.6518 0.3989 0.082 Uiso 1 1 calc R . . 
C43 C 0.1154(6) 0.8603(4) 0.0739(3) 0.0681(14) Uani 1 1 d . . . 
C44 C 0.2433(5) 1.0061(4) 0.0559(3) 0.0646(13) Uani 1 1 d . . . 
C45 C 0.2165(6) 0.7878(4) -0.2889(3) 0.0734(16) Uani 1 1 d . . . 
H45 H 0.1665 0.8295 -0.3310 0.088 Uiso 1 1 calc R . . 
C48 C 0.2136(6) 0.8323(5) -0.2150(3) 0.0771(17) Uani 1 1 d . . . 
H48 H 0.1612 0.9035 -0.2079 0.092 Uiso 1 1 calc R . . 
C49 C 0.2849(6) 0.7748(5) -0.1531(3) 0.0736(16) Uani 1 1 d . . . 
C51 C 0.3181(8) 1.0815(6) 0.0043(4) 0.100(2) Uani 1 1 d . . . 
H51A H 0.3296 1.0563 -0.0493 0.150 Uiso 1 1 calc R . . 
H51B H 0.4106 1.0805 0.0260 0.150 Uiso 1 1 calc R . . 
H51C H 0.2618 1.1554 0.0036 0.150 Uiso 1 1 calc R . . 
C53 C -0.2198(6) 0.8294(4) 0.2585(3) 0.0682(14) Uani 1 1 d . . . 
C57 C 0.3206(6) 1.2775(5) 0.2734(4) 0.0813(18) Uani 1 1 d . . . 
H57 H 0.4040 1.2262 0.2619 0.098 Uiso 1 1 calc R . . 
C58 C 0.2009(5) 1.4343(4) 0.3422(4) 0.0693(15) Uani 1 1 d . . . 
C59 C -0.1799(6) 0.7408(4) 0.3118(3) 0.0667(13) Uani 1 1 d . . . 
H59 H -0.0854 0.7017 0.3136 0.080 Uiso 1 1 calc R . . 
C60 C 0.3208(6) 1.3577(5) 0.3267(4) 0.0765(16) Uani 1 1 d . . . 
H60 H 0.4051 1.3596 0.3528 0.092 Uiso 1 1 calc R . . 
C62 C 0.3622(7) 0.6246(5) -0.2370(3) 0.0844(19) Uani 1 1 d . . . 
H62 H 0.4132 0.5528 -0.2435 0.101 Uiso 1 1 calc R . . 
C65 C -0.4222(6) 0.7673(4) 0.3606(3) 0.0660(13) Uani 1 1 d . . . 
C69 C 0.1939(6) 1.2748(5) 0.2372(3) 0.0748(16) Uani 1 1 d . . . 
C71 C 0.2917(6) 1.1058(5) 0.1765(4) 0.0794(17) Uani 1 1 d . . . 
H71A H 0.3290 1.0789 0.2288 0.095 Uiso 1 1 calc R . . 
H71B H 0.3693 1.1238 0.1434 0.095 Uiso 1 1 calc R . . 
C74 C 0.0197(6) 0.8094(5) 0.2078(4) 0.0786(16) Uani 1 1 d . . . 
H74A H 0.0275 0.7366 0.1873 0.094 Uiso 1 1 calc R . . 
H74B H 0.0574 0.8011 0.2616 0.094 Uiso 1 1 calc R . . 
C75 C 0.1887(7) 0.9124(5) -0.0637(3) 0.0780(16) Uani 1 1 d . . . 
H75A H 0.0944 0.9083 -0.0819 0.094 Uiso 1 1 calc R . . 
H75B H 0.2176 0.9747 -0.0918 0.094 Uiso 1 1 calc R . . 
C79 C 0.2066(6) 1.5284(5) 0.3930(3) 0.0698(14) Uani 1 1 d . . . 
C82 C -0.4591(6) 0.8549(5) 0.3059(4) 0.0818(18) Uani 1 1 d . . . 
H82 H -0.5541 0.8929 0.3028 0.098 Uiso 1 1 calc R . . 
C90 C -0.3586(6) 0.8869(5) 0.2560(4) 0.0872(19) Uani 1 1 d . . . 
H90 H -0.3844 0.9477 0.2204 0.105 Uiso 1 1 calc R . . 
C101 C 0.0533(8) 0.7684(6) 0.0385(5) 0.103(2) Uani 1 1 d . . . 
H10A H 0.0095 0.7947 -0.0119 0.154 Uiso 1 1 calc R . . 
H10B H -0.0172 0.7480 0.0749 0.154 Uiso 1 1 calc R . . 
H10C H 0.1289 0.7052 0.0304 0.154 Uiso 1 1 calc R . . 
C106 C 0.0775(7) 1.3524(5) 0.2510(5) 0.099(2) Uani 1 1 d . . . 
H106 H -0.0060 1.3512 0.2238 0.119 Uiso 1 1 calc R . . 
 
loop_ 
 _atom_site_aniso_label 
 _atom_site_aniso_U_11 
 _atom_site_aniso_U_22 
 _atom_site_aniso_U_33 
 _atom_site_aniso_U_23 
 _atom_site_aniso_U_13 
 _atom_site_aniso_U_12 
Co1 0.0459(5) 0.0565(5) 0.0458(5) -0.0065(4) -0.0089(3) -0.0003(4) 
N1 0.064(3) 0.090(3) 0.075(3) -0.016(3) -0.011(2) 0.004(3) 
Co2 0.0501(4) 0.0733(5) 0.0545(4) -0.0086(3) -0.0111(3) -0.0016(3) 
O3 0.061(2) 0.095(3) 0.056(2) -0.0125(19) -0.0111(16) 0.011(2) 
O4 0.069(2) 0.075(2) 0.0502(19) -0.0140(17) -0.0022(16) 0.0016(19) 
C6 0.076(4) 0.088(4) 0.078(4) 0.001(3) -0.012(3) 0.002(4) 
O7 0.069(2) 0.072(2) 0.067(2) 0.0072(19) -0.0047(17) -0.0106(19) 
O8 0.049(2) 0.091(2) 0.072(2) -0.0216(19) -0.0203(16) -0.0014(18) 
C8 0.105(6) 0.087(5) 0.128(7) 0.013(5) -0.011(5) 0.002(4) 
C10 0.096(6) 0.185(9) 0.120(7) 0.019(6) 0.046(5) 0.017(6) 
O11 0.053(2) 0.088(3) 0.083(3) -0.016(2) -0.0029(19) 0.0041(19) 
O12 0.054(2) 0.088(3) 0.085(3) 0.023(2) -0.0024(18) -0.0053(19) 
O15 0.099(3) 0.101(3) 0.048(2) -0.023(2) -0.0126(19) 0.026(2) 
O17 0.056(2) 0.090(3) 0.086(3) 0.014(2) -0.0014(18) 0.000(2) 
O18 0.092(3) 0.073(2) 0.103(3) -0.024(2) -0.042(2) 0.000(2) 
C20 0.103(5) 0.084(4) 0.058(3) -0.009(3) -0.013(3) 0.031(4) 
C22 0.050(3) 0.083(3) 0.049(3) -0.007(2) -0.008(2) 0.001(3) 
C24 0.061(3) 0.071(3) 0.045(3) -0.001(2) 0.001(2) -0.002(3) 
C25 0.057(3) 0.075(3) 0.061(3) -0.002(3) 0.002(2) -0.008(3) 
O27 0.069(3) 0.080(3) 0.123(4) -0.036(2) -0.039(2) 0.013(2) 
C28 0.070(3) 0.073(3) 0.043(3) -0.012(2) 0.001(2) -0.003(3) 
C29 0.049(3) 0.082(3) 0.051(3) -0.009(2) 0.001(2) -0.001(3) 
C30 0.046(3) 0.071(3) 0.063(3) -0.002(3) -0.007(2) 0.000(2) 
C37 0.067(4) 0.086(4) 0.131(6) -0.041(4) -0.036(4) 0.001(3) 
C38 0.081(4) 0.104(4) 0.062(3) -0.006(3) -0.006(3) 0.000(3) 
C40 0.060(3) 0.075(3) 0.055(3) -0.017(3) -0.002(2) -0.006(3) 
C42 0.060(3) 0.076(3) 0.068(3) 0.013(3) -0.009(2) -0.011(3) 
C43 0.067(3) 0.065(3) 0.070(3) -0.010(3) -0.014(3) -0.004(3) 
C44 0.058(3) 0.071(3) 0.063(3) -0.009(3) -0.001(2) -0.007(3) 
C45 0.087(4) 0.069(3) 0.052(3) -0.007(3) -0.014(3) 0.015(3) 
C48 0.090(4) 0.074(3) 0.050(3) -0.009(3) -0.005(3) 0.023(3) 
C49 0.079(4) 0.083(4) 0.047(3) -0.013(3) -0.005(2) 0.012(3) 
C51 0.093(5) 0.124(5) 0.083(5) 0.020(4) 0.015(4) -0.031(4) 
C53 0.059(3) 0.075(3) 0.067(3) 0.012(3) -0.007(2) -0.008(3) 
C57 0.057(3) 0.083(4) 0.101(5) -0.032(3) -0.015(3) 0.001(3) 
C58 0.053(3) 0.067(3) 0.085(4) -0.017(3) -0.017(3) 0.001(3) 
C59 0.052(3) 0.074(3) 0.072(4) 0.000(3) -0.003(2) -0.008(3) 
C60 0.068(4) 0.084(4) 0.080(4) -0.019(3) -0.020(3) -0.015(3) 
C62 0.102(5) 0.080(4) 0.053(3) -0.007(3) -0.014(3) 0.025(3) 
C65 0.059(3) 0.074(3) 0.059(3) 0.005(3) -0.001(2) -0.004(3) 
C69 0.079(4) 0.075(4) 0.070(4) -0.017(3) -0.026(3) -0.010(3) 
C71 0.067(4) 0.092(4) 0.081(4) -0.020(3) -0.012(3) -0.016(3) 
C74 0.061(4) 0.078(4) 0.086(4) 0.016(3) -0.005(3) 0.003(3) 
C75 0.093(4) 0.073(3) 0.059(3) -0.011(3) -0.002(3) 0.004(3) 
C79 0.065(4) 0.084(4) 0.061(3) -0.002(3) -0.014(2) -0.016(3) 
C82 0.054(3) 0.093(4) 0.084(4) 0.022(3) 0.008(3) 0.010(3) 
C90 0.057(4) 0.091(4) 0.100(5) 0.038(4) 0.003(3) 0.004(3) 
C101 0.091(5) 0.102(5) 0.118(6) -0.036(4) -0.014(4) -0.019(4) 
C106 0.081(5) 0.080(4) 0.134(6) -0.038(4) -0.049(4) -0.001(4) 
 
_geom_special_details 
; 
 All esds (except the esd in the dihedral angle between two l.s. planes) 
 are estimated using the full covariance matrix.  The cell esds are taken 
 into account individually in the estimation of esds in distances, angles 
 and torsion angles; correlations between esds in cell parameters are only 
 used when they are defined by crystal symmetry.  An approximate (isotropic) 
 treatment of cell esds is used for estimating esds involving l.s. planes. 
; 
 
loop_ 
 _geom_bond_atom_site_label_1 
 _geom_bond_atom_site_label_2 
 _geom_bond_distance 
 _geom_bond_site_symmetry_2 
 _geom_bond_publ_flag 
Co1 O7 2.075(5) 2_565 ? 
Co1 O7 2.075(5) 1_654 ? 
Co1 O8 2.129(4) 1_544 ? 
Co1 O8 2.129(4) 2_675 ? 
Co1 O4 2.138(4) . ? 
Co1 O4 2.138(4) 2_664 ? 
N1 C6 1.312(8) . ? 
N1 C8 1.488(9) . ? 
N1 C10 1.528(9) . ? 
Co2 O3 1.936(5) . ? 
Co2 O17 1.992(5) 1_654 ? 
Co2 O27 1.999(4) 1_544 ? 
Co2 O11 2.059(5) . ? 
Co2 O8 2.354(5) 1_544 ? 
O3 C29 1.291(6) . ? 
O4 C29 1.256(6) . ? 
C6 O11 1.265(8) . ? 
O7 C25 1.263(7) . ? 
O7 Co1 2.075(5) 1_456 ? 
O8 C79 1.262(6) . ? 
O8 Co1 2.129(4) 1_566 ? 
O8 Co2 2.354(5) 1_566 ? 
O12 C53 1.373(7) . ? 
O12 C74 1.471(7) . ? 
O15 C49 1.374(6) . ? 
O15 C75 1.447(7) . ? 
O17 C25 1.281(7) . ? 
O17 Co2 1.992(5) 1_456 ? 
O18 C69 1.375(6) . ? 
O18 C71 1.447(7) . ? 
C20 C62 1.383(8) . ? 
C20 C49 1.399(8) . ? 
C20 H20 0.9500 . ? 
C22 C40 1.389(8) . ? 
C22 C30 1.418(8) . ? 
C22 C38 1.551(8) . ? 
C24 C45 1.387(7) . ? 
C24 C62 1.406(7) . ? 
C24 C29 1.505(7) . ? 
C25 C65 1.506(8) . ? 
O27 C79 1.264(7) . ? 
O27 Co2 1.999(4) 1_566 ? 
C28 C44 1.387(8) . ? 
C28 C43 1.412(8) . ? 
C28 C75 1.534(7) . ? 
C30 C43 1.404(8) . ? 
C30 C74 1.526(8) . ? 
C37 C106 1.370(8) . ? 
C37 C58 1.414(8) . ? 
C37 H37 0.9500 . ? 
C38 H38A 0.9800 . ? 
C38 H38B 0.9800 . ? 
C38 H38C 0.9800 . ? 
C40 C44 1.440(7) . ? 
C40 C71 1.510(8) . ? 
C42 C59 1.394(8) . ? 
C42 C65 1.403(8) . ? 
C42 H42 0.9500 . ? 
C43 C101 1.573(8) . ? 
C44 C51 1.546(8) . ? 
C45 C48 1.404(7) . ? 
C45 H45 0.9500 . ? 
C48 C49 1.369(8) . ? 
C48 H48 0.9500 . ? 
C51 H51A 0.9800 . ? 
C51 H51B 0.9800 . ? 
C51 H51C 0.9800 . ? 
C53 C90 1.396(8) . ? 
C53 C59 1.402(8) . ? 
C57 C60 1.399(8) . ? 
C57 C69 1.402(8) . ? 
C57 H57 0.9500 . ? 
C58 C60 1.381(8) . ? 
C58 C79 1.520(8) . ? 
C59 H59 0.9500 . ? 
C60 H60 0.9500 . ? 
C62 H62 0.9500 . ? 
C65 C82 1.405(8) . ? 
C69 C106 1.360(8) . ? 
C71 H71A 0.9900 . ? 
C71 H71B 0.9900 . ? 
C74 H74A 0.9900 . ? 
C74 H74B 0.9900 . ? 
C75 H75A 0.9900 . ? 
C75 H75B 0.9900 . ? 
C82 C90 1.391(8) . ? 
C82 H82 0.9500 . ? 
C90 H90 0.9500 . ? 
C101 H10A 0.9800 . ? 
C101 H10B 0.9800 . ? 
C101 H10C 0.9800 . ? 
C106 H106 0.9500 . ? 
 
loop_ 
 _geom_angle_atom_site_label_1 
 _geom_angle_atom_site_label_2 
 _geom_angle_atom_site_label_3 
 _geom_angle 
 _geom_angle_site_symmetry_1 
 _geom_angle_site_symmetry_3 
 _geom_angle_publ_flag 
O7 Co1 O7 180.000(1) 2_565 1_654 ? 
O7 Co1 O8 93.14(17) 2_565 1_544 ? 
O7 Co1 O8 86.86(17) 1_654 1_544 ? 
O7 Co1 O8 86.86(17) 2_565 2_675 ? 
O7 Co1 O8 93.14(17) 1_654 2_675 ? 
O8 Co1 O8 180.00(10) 1_544 2_675 ? 
O7 Co1 O4 90.16(17) 2_565 . ? 
O7 Co1 O4 89.84(17) 1_654 . ? 
O8 Co1 O4 92.97(19) 1_544 . ? 
O8 Co1 O4 87.03(19) 2_675 . ? 
O7 Co1 O4 89.84(17) 2_565 2_664 ? 
O7 Co1 O4 90.16(17) 1_654 2_664 ? 
O8 Co1 O4 87.03(19) 1_544 2_664 ? 
O8 Co1 O4 92.97(19) 2_675 2_664 ? 
O4 Co1 O4 180.0(2) . 2_664 ? 
C6 N1 C8 123.4(6) . . ? 
C6 N1 C10 121.1(6) . . ? 
C8 N1 C10 115.4(6) . . ? 
O3 Co2 O17 114.47(19) . 1_654 ? 
O3 Co2 O27 124.0(2) . 1_544 ? 
O17 Co2 O27 116.6(2) 1_654 1_544 ? 
O3 Co2 O11 94.15(17) . . ? 
O17 Co2 O11 102.0(2) 1_654 . ? 
O27 Co2 O11 96.5(2) 1_544 . ? 
O3 Co2 O8 97.77(15) . 1_544 ? 
O17 Co2 O8 92.31(19) 1_654 1_544 ? 
O27 Co2 O8 59.30(17) 1_544 1_544 ? 
O11 Co2 O8 155.64(15) . 1_544 ? 
C29 O3 Co2 134.1(3) . . ? 
C29 O4 Co1 132.3(3) . . ? 
O11 C6 N1 122.1(6) . . ? 
C25 O7 Co1 137.4(4) . 1_456 ? 
C79 O8 Co1 170.0(4) . 1_566 ? 
C79 O8 Co2 82.6(3) . 1_566 ? 
Co1 O8 Co2 105.97(16) 1_566 1_566 ? 
C6 O11 Co2 119.4(4) . . ? 
C53 O12 C74 117.8(4) . . ? 
C49 O15 C75 116.5(4) . . ? 
C25 O17 Co2 118.8(4) . 1_456 ? 
C69 O18 C71 118.5(4) . . ? 
C62 C20 C49 120.9(6) . . ? 
C62 C20 H20 119.5 . . ? 
C49 C20 H20 119.5 . . ? 
C40 C22 C30 120.2(5) . . ? 
C40 C22 C38 120.7(5) . . ? 
C30 C22 C38 119.1(5) . . ? 
C45 C24 C62 117.7(5) . . ? 
C45 C24 C29 120.0(5) . . ? 
C62 C24 C29 122.3(5) . . ? 
O7 C25 O17 124.5(5) . . ? 
O7 C25 C65 119.2(5) . . ? 
O17 C25 C65 116.3(5) . . ? 
C79 O27 Co2 98.9(4) . 1_566 ? 
C44 C28 C43 121.2(4) . . ? 
C44 C28 C75 120.4(5) . . ? 
C43 C28 C75 118.3(5) . . ? 
O4 C29 O3 126.2(5) . . ? 
O4 C29 C24 119.3(5) . . ? 
O3 C29 C24 114.5(4) . . ? 
C43 C30 C22 119.5(5) . . ? 
C43 C30 C74 120.9(5) . . ? 
C22 C30 C74 119.6(5) . . ? 
C106 C37 C58 118.6(6) . . ? 
C106 C37 H37 120.7 . . ? 
C58 C37 H37 120.7 . . ? 
C22 C38 H38A 109.5 . . ? 
C22 C38 H38B 109.5 . . ? 
H38A C38 H38B 109.5 . . ? 
C22 C38 H38C 109.5 . . ? 
H38A C38 H38C 109.5 . . ? 
H38B C38 H38C 109.5 . . ? 
C22 C40 C44 120.4(5) . . ? 
C22 C40 C71 118.3(5) . . ? 
C44 C40 C71 121.3(5) . . ? 
C59 C42 C65 121.9(5) . . ? 
C59 C42 H42 119.0 . . ? 
C65 C42 H42 119.0 . . ? 
C30 C43 C28 119.9(5) . . ? 
C30 C43 C101 119.4(6) . . ? 
C28 C43 C101 120.7(5) . . ? 
C28 C44 C40 118.6(5) . . ? 
C28 C44 C51 122.7(5) . . ? 
C40 C44 C51 118.7(5) . . ? 
C24 C45 C48 120.9(5) . . ? 
C24 C45 H45 119.6 . . ? 
C48 C45 H45 119.6 . . ? 
C49 C48 C45 121.2(5) . . ? 
C49 C48 H48 119.4 . . ? 
C45 C48 H48 119.4 . . ? 
C48 C49 O15 124.4(5) . . ? 
C48 C49 C20 118.4(5) . . ? 
O15 C49 C20 117.2(5) . . ? 
C44 C51 H51A 109.5 . . ? 
C44 C51 H51B 109.5 . . ? 
H51A C51 H51B 109.5 . . ? 
C44 C51 H51C 109.5 . . ? 
H51A C51 H51C 109.5 . . ? 
H51B C51 H51C 109.5 . . ? 
O12 C53 C90 115.7(5) . . ? 
O12 C53 C59 123.7(5) . . ? 
C90 C53 C59 120.6(5) . . ? 
C60 C57 C69 118.2(5) . . ? 
C60 C57 H57 120.9 . . ? 
C69 C57 H57 120.9 . . ? 
C60 C58 C37 119.2(5) . . ? 
C60 C58 C79 120.6(5) . . ? 
C37 C58 C79 119.7(5) . . ? 
C42 C59 C53 118.6(5) . . ? 
C42 C59 H59 120.7 . . ? 
C53 C59 H59 120.7 . . ? 
C58 C60 C57 121.3(5) . . ? 
C58 C60 H60 119.3 . . ? 
C57 C60 H60 119.3 . . ? 
C20 C62 C24 120.9(5) . . ? 
C20 C62 H62 119.6 . . ? 
C24 C62 H62 119.6 . . ? 
C42 C65 C82 118.1(5) . . ? 
C42 C65 C25 119.0(5) . . ? 
C82 C65 C25 122.8(5) . . ? 
C106 C69 O18 116.0(5) . . ? 
C106 C69 C57 120.1(5) . . ? 
O18 C69 C57 123.8(5) . . ? 
O18 C71 C40 107.4(5) . . ? 
O18 C71 H71A 110.2 . . ? 
C40 C71 H71A 110.2 . . ? 
O18 C71 H71B 110.2 . . ? 
C40 C71 H71B 110.2 . . ? 
H71A C71 H71B 108.5 . . ? 
O12 C74 C30 106.6(4) . . ? 
O12 C74 H74A 110.4 . . ? 
C30 C74 H74A 110.4 . . ? 
O12 C74 H74B 110.4 . . ? 
C30 C74 H74B 110.4 . . ? 
H74A C74 H74B 108.6 . . ? 
O15 C75 C28 108.2(4) . . ? 
O15 C75 H75A 110.1 . . ? 
C28 C75 H75A 110.1 . . ? 
O15 C75 H75B 110.1 . . ? 
C28 C75 H75B 110.1 . . ? 
H75A C75 H75B 108.4 . . ? 
O8 C79 O27 119.0(5) . . ? 
O8 C79 C58 120.3(5) . . ? 
O27 C79 C58 120.6(5) . . ? 
C90 C82 C65 120.9(5) . . ? 
C90 C82 H82 119.6 . . ? 
C65 C82 H82 119.6 . . ? 
C82 C90 C53 119.8(6) . . ? 
C82 C90 H90 120.1 . . ? 
C53 C90 H90 120.1 . . ? 
C43 C101 H10A 109.5 . . ? 
C43 C101 H10B 109.5 . . ? 
H10A C101 H10B 109.5 . . ? 
C43 C101 H10C 109.5 . . ? 
H10A C101 H10C 109.5 . . ? 
H10B C101 H10C 109.5 . . ? 
C69 C106 C37 122.5(6) . . ? 
C69 C106 H106 118.7 . . ? 
C37 C106 H106 118.7 . . ? 
 
loop_ 
 _geom_torsion_atom_site_label_1 
 _geom_torsion_atom_site_label_2 
 _geom_torsion_atom_site_label_3 
 _geom_torsion_atom_site_label_4 
 _geom_torsion 
 _geom_torsion_site_symmetry_1 
 _geom_torsion_site_symmetry_2 
 _geom_torsion_site_symmetry_3 
 _geom_torsion_site_symmetry_4 
 _geom_torsion_publ_flag 
O17 Co2 O3 C29 -66.2(6) 1_654 . . . ? 
O27 Co2 O3 C29 87.9(6) 1_544 . . . ? 
O11 Co2 O3 C29 -171.4(5) . . . . ? 
O8 Co2 O3 C29 29.9(6) 1_544 . . . ? 
O7 Co1 O4 C29 -144.5(5) 2_565 . . . ? 
O7 Co1 O4 C29 35.5(5) 1_654 . . . ? 
O8 Co1 O4 C29 -51.3(5) 1_544 . . . ? 
O8 Co1 O4 C29 128.7(5) 2_675 . . . ? 
O4 Co1 O4 C29 5(100) 2_664 . . . ? 
C8 N1 C6 O11 1.0(10) . . . . ? 
C10 N1 C6 O11 177.2(7) . . . . ? 
N1 C6 O11 Co2 -175.2(4) . . . . ? 
O3 Co2 O11 C6 -51.2(5) . . . . ? 
O17 Co2 O11 C6 -167.3(4) 1_654 . . . ? 
O27 Co2 O11 C6 73.7(5) 1_544 . . . ? 
O8 Co2 O11 C6 68.0(6) 1_544 . . . ? 
Co1 O7 C25 O17 65.9(8) 1_456 . . . ? 
Co1 O7 C25 C65 -117.5(5) 1_456 . . . ? 
Co2 O17 C25 O7 -13.6(8) 1_456 . . . ? 
Co2 O17 C25 C65 169.8(4) 1_456 . . . ? 
Co1 O4 C29 O3 32.6(9) . . . . ? 
Co1 O4 C29 C24 -148.3(4) . . . . ? 
Co2 O3 C29 O4 -20.7(9) . . . . ? 
Co2 O3 C29 C24 160.2(4) . . . . ? 
C45 C24 C29 O4 166.7(5) . . . . ? 
C62 C24 C29 O4 -11.3(9) . . . . ? 
C45 C24 C29 O3 -14.1(8) . . . . ? 
C62 C24 C29 O3 167.9(6) . . . . ? 
C40 C22 C30 C43 -2.0(7) . . . . ? 
C38 C22 C30 C43 176.6(5) . . . . ? 
C40 C22 C30 C74 -179.7(5) . . . . ? 
C38 C22 C30 C74 -1.2(7) . . . . ? 
C30 C22 C40 C44 3.4(7) . . . . ? 
C38 C22 C40 C44 -175.1(5) . . . . ? 
C30 C22 C40 C71 -178.7(4) . . . . ? 
C38 C22 C40 C71 2.8(7) . . . . ? 
C22 C30 C43 C28 -1.0(7) . . . . ? 
C74 C30 C43 C28 176.8(5) . . . . ? 
C22 C30 C43 C101 179.6(5) . . . . ? 
C74 C30 C43 C101 -2.7(7) . . . . ? 
C44 C28 C43 C30 2.5(8) . . . . ? 
C75 C28 C43 C30 -175.4(5) . . . . ? 
C44 C28 C43 C101 -178.1(5) . . . . ? 
C75 C28 C43 C101 4.0(8) . . . . ? 
C43 C28 C44 C40 -1.0(8) . . . . ? 
C75 C28 C44 C40 176.8(5) . . . . ? 
C43 C28 C44 C51 -179.3(5) . . . . ? 
C75 C28 C44 C51 -1.4(8) . . . . ? 
C22 C40 C44 C28 -1.9(7) . . . . ? 
C71 C40 C44 C28 -179.7(5) . . . . ? 
C22 C40 C44 C51 176.4(5) . . . . ? 
C71 C40 C44 C51 -1.4(8) . . . . ? 
C62 C24 C45 C48 0.8(9) . . . . ? 
C29 C24 C45 C48 -177.3(6) . . . . ? 
C24 C45 C48 C49 0.3(10) . . . . ? 
C45 C48 C49 O15 179.2(6) . . . . ? 
C45 C48 C49 C20 -1.4(10) . . . . ? 
C75 O15 C49 C48 12.3(10) . . . . ? 
C75 O15 C49 C20 -167.2(6) . . . . ? 
C62 C20 C49 C48 1.3(11) . . . . ? 
C62 C20 C49 O15 -179.2(6) . . . . ? 
C74 O12 C53 C90 -179.1(6) . . . . ? 
C74 O12 C53 C59 3.4(8) . . . . ? 
C106 C37 C58 C60 1.5(11) . . . . ? 
C106 C37 C58 C79 173.7(6) . . . . ? 
C65 C42 C59 C53 0.5(9) . . . . ? 
O12 C53 C59 C42 177.4(5) . . . . ? 
C90 C53 C59 C42 0.0(9) . . . . ? 
C37 C58 C60 C57 -0.9(10) . . . . ? 
C79 C58 C60 C57 -173.0(6) . . . . ? 
C69 C57 C60 C58 -1.7(10) . . . . ? 
C49 C20 C62 C24 -0.1(11) . . . . ? 
C45 C24 C62 C20 -0.9(10) . . . . ? 
C29 C24 C62 C20 177.2(6) . . . . ? 
C59 C42 C65 C82 0.3(9) . . . . ? 
C59 C42 C65 C25 176.6(5) . . . . ? 
O7 C25 C65 C42 13.3(8) . . . . ? 
O17 C25 C65 C42 -169.9(5) . . . . ? 
O7 C25 C65 C82 -170.6(6) . . . . ? 
O17 C25 C65 C82 6.2(8) . . . . ? 
C71 O18 C69 C106 -169.5(6) . . . . ? 
C71 O18 C69 C57 14.3(9) . . . . ? 
C60 C57 C69 C106 3.7(10) . . . . ? 
C60 C57 C69 O18 179.7(6) . . . . ? 
C69 O18 C71 C40 159.1(5) . . . . ? 
C22 C40 C71 O18 -81.8(6) . . . . ? 
C44 C40 C71 O18 96.1(6) . . . . ? 
C53 O12 C74 C30 -173.6(5) . . . . ? 
C43 C30 C74 O12 -89.5(6) . . . . ? 
C22 C30 C74 O12 88.2(6) . . . . ? 
C49 O15 C75 C28 166.6(5) . . . . ? 
C44 C28 C75 O15 108.0(6) . . . . ? 
C43 C28 C75 O15 -74.0(7) . . . . ? 
Co1 O8 C79 O27 145.7(19) 1_566 . . . ? 
Co2 O8 C79 O27 -4.0(5) 1_566 . . . ? 
Co1 O8 C79 C58 -38(2) 1_566 . . . ? 
Co2 O8 C79 C58 172.4(5) 1_566 . . . ? 
Co2 O27 C79 O8 4.8(6) 1_566 . . . ? 
Co2 O27 C79 C58 -171.6(5) 1_566 . . . ? 
C60 C58 C79 O8 -11.2(9) . . . . ? 
C37 C58 C79 O8 176.8(6) . . . . ? 
C60 C58 C79 O27 165.2(6) . . . . ? 
C37 C58 C79 O27 -6.9(9) . . . . ? 
C42 C65 C82 C90 -1.5(10) . . . . ? 
C25 C65 C82 C90 -177.6(6) . . . . ? 
C65 C82 C90 C53 2.0(11) . . . . ? 
O12 C53 C90 C82 -178.8(6) . . . . ? 
C59 C53 C90 C82 -1.2(10) . . . . ? 
O18 C69 C106 C37 -179.5(7) . . . . ? 
C57 C69 C106 C37 -3.2(12) . . . . ? 
C58 C37 C106 C69 0.6(12) . . . . ? 
 
_diffrn_measured_fraction_theta_max    0.908 
_diffrn_reflns_theta_full              27.48 
_diffrn_measured_fraction_theta_full   0.908 
_refine_diff_density_max    0.916 
_refine_diff_density_min   -0.978 
_refine_diff_density_rms    0.142

# SQUEEZE RESULTS (APPEND TO CIF)
loop_
  _platon_squeeze_void_nr
  _platon_squeeze_void_average_x
  _platon_squeeze_void_average_y
  _platon_squeeze_void_average_z
  _platon_squeeze_void_volume
  _platon_squeeze_void_count_electrons
         1    -0.027     0.500     0.000     447.9       0.4
_platon_squeeze_details
;
;
